# Supplementary material
Source: PubMed Central journal article supplement (PMC4649639)
Supplement: 10.1534_115.181289_genetics.115.181289-2.pdf [file 10.1534_115.181289_genetics.115.181289-2.pdf]

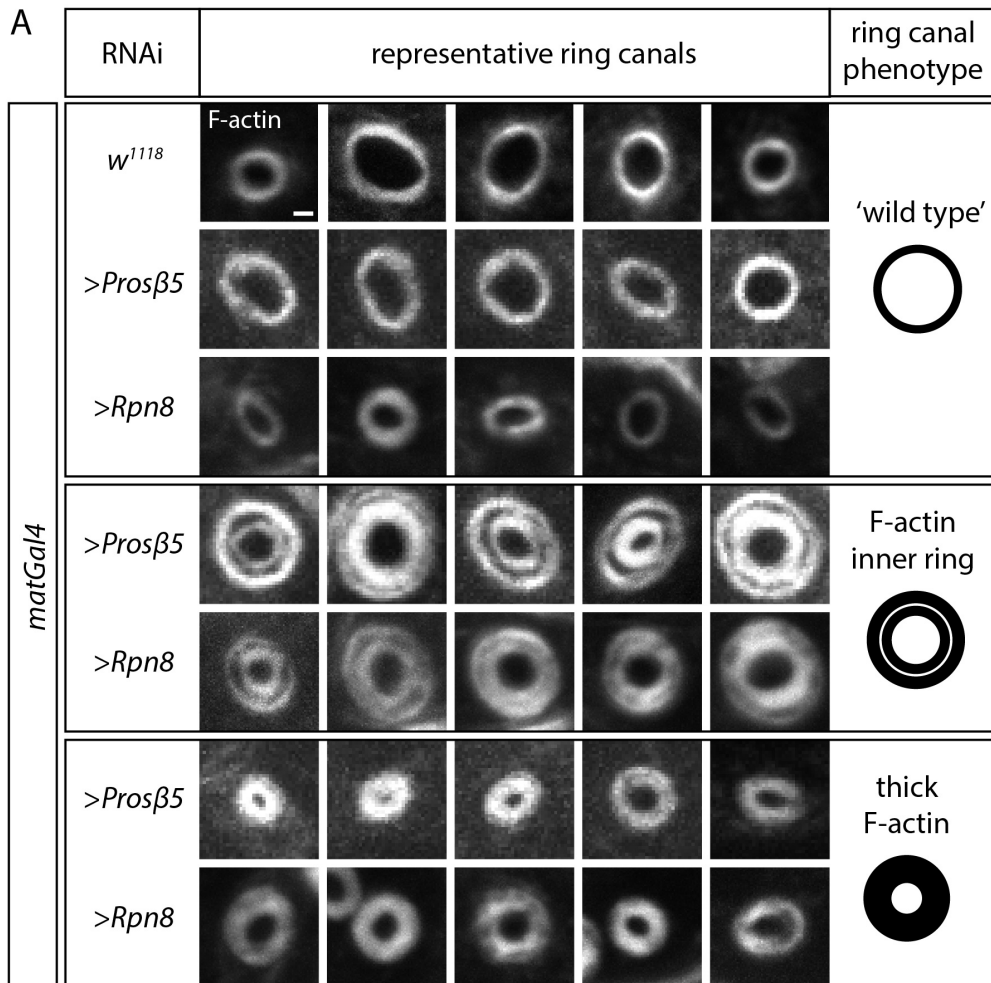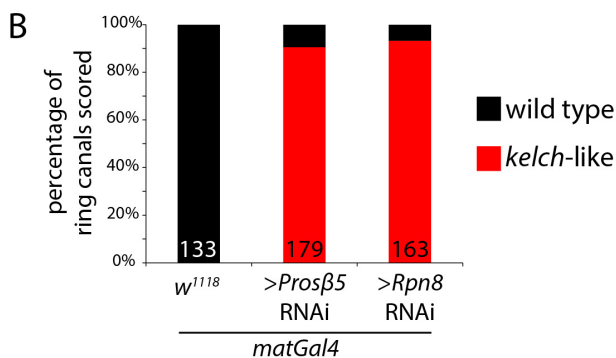

**Figure S4.** Proteasome inhibition by RNAi leads to high penetrance of *kelch*-like ring canals. (A) Proteasome inhibition by RNAi (targeting Prosβ5 or Rpn8 proteasome subunits) results in different classes of ring canal phenotypes: (top) morphologically normal (“wild type”) ring canals, (middle) ring canals with a prevalent inner ring of F-actin, (bottom) ring canals with a thick, *kelch*-like F-actin ring. (B) Quantification of penetrance of *kelch*-like ring canals. Ring canals that displayed an aberrant F-actin ring or had abnormally thicker F-actin rings were deemed *kelch*-like. Sample size is indicated at the base of each bar. Scale bar: (A) 1 μm.
