# Supplementary material
Source: PubMed Central journal article supplement (PMC4649639)
Supplement: 10.1534_115.181289_genetics.115.181289-3.pdf [file 10.1534_115.181289_genetics.115.181289-3.pdf]

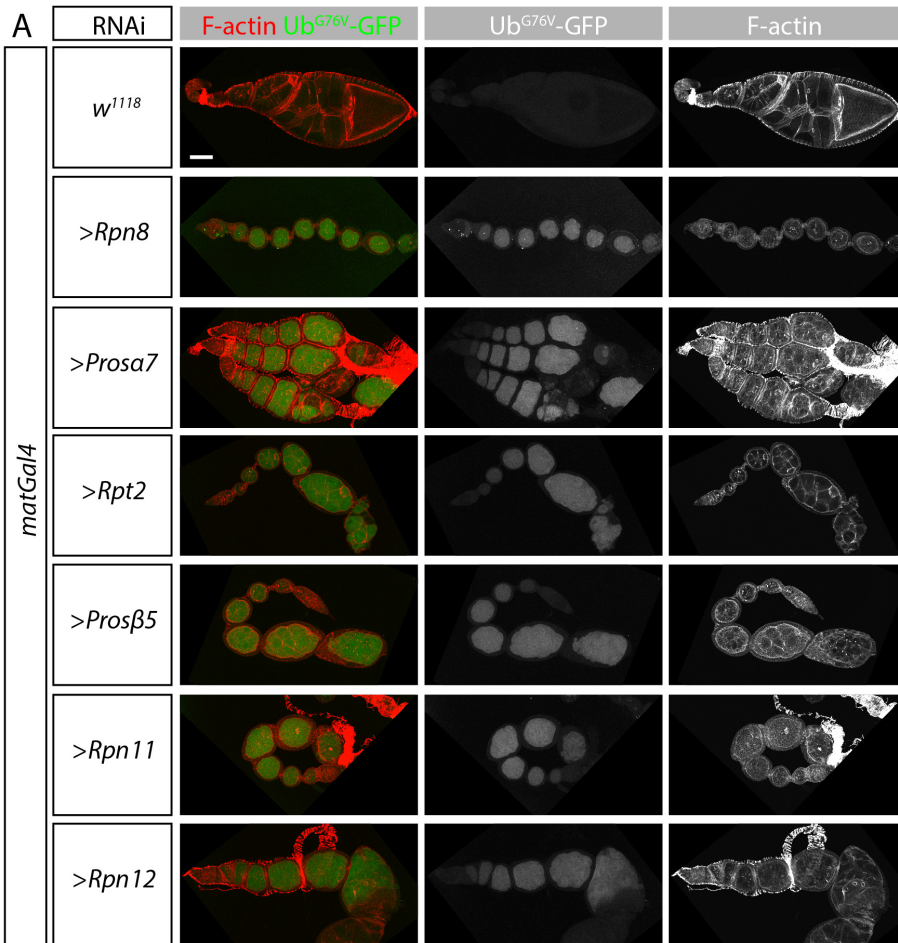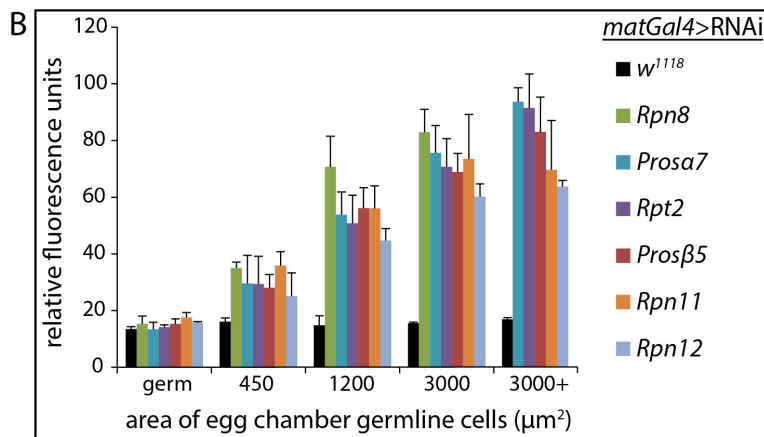

**Figure S3.** Multiple RNAi lines are effective at inhibiting the proteasome as evidenced by Ub<sup>G76V</sup>-GFP accumulation. (A) Ub<sup>G76V</sup>-GFP proteasome activity reporter accumulates upon proteasome inhibition with various RNAi lines targeting proteasome subunits. (B) Quantification of Ub<sup>G76V</sup>-GFP reporter for each RNAi line. Note that *matGal4>Rpn8* RNAi egg chambers have the highest extent of Ub<sup>G76V</sup>-GFP reporter protein and the most severe growth arrest (no egg chambers in '3000+ μm<sup>2</sup>' area grouping). Scale bar: (A) 50 μm
